# Supplementary material for: Reactivity studies on lanthanum and cerium hydrido metallocenes
Source: Royal Society of Chemistry journal article supplement (doi:10.1039/d2dt00996j), 2022-01-01
Supplement: d2dt00996j1.pdf [file d2dt00996j1.pdf]

*Supporting Information for*

# Reactivity Studies on Lanthanum and Cerium Hydrido Metallocenes

Chengkun Yi, Lingfeng Wu, Liang Chen\*, Wenshan Ren\*

College of Chemistry and Chemical Engineering, Southwest University, Chongqing 400715, China

[rwsh603@swu.edu.cn](mailto:rwsh603@swu.edu.cn)

## TABLE OF CONTENTS

|                                        |           |
|----------------------------------------|-----------|
| <b>1. Experimental section</b>         | <b>2</b>  |
| <b>2. ORTEP diagrams</b>               | <b>10</b> |
| <b>3. Crystallographic details</b>     | <b>13</b> |
| <b>4. NMR Spectra of New Compounds</b> | <b>16</b> |

## EXPERIMENTAL SECTION

**General Procedures.** All reactions and manipulations were carried out under an atmosphere of dry dinitrogen with rigid exclusion of air and moisture using standard Schlenk or cannula techniques, or in a glovebox. All organic solvents were freshly distilled from sodium benzophenone ketyl immediately prior to use.  $[\eta^5\text{-1,3-(Me}_3\text{C)}_2\text{C}_5\text{H}_3]_2\text{Ln}(\text{CH}_2\text{C}_6\text{H}_4\text{-}o\text{-NMe}_2)$  (Ln = La, Ce)<sup>1</sup> were prepared according to the literature method. All other chemicals were purchased from Aldrich Chemical Co. and Energy Chemical Co. and used as received unless otherwise noted. All operations in this procedure should be conducted in a well-ventilated hood. Infrared spectra were obtained from KBr pellets on an Avatar 360 Fourier transform spectrometer. <sup>1</sup>H and <sup>13</sup>C{<sup>1</sup>H} NMR spectra were recorded on a Bruker AV 600 spectrometer at 600 and 150 MHz, respectively. All chemical shifts were reported in  $\delta$  units with reference to the residual protons of the deuterated solvents, which were internal standards, for proton and carbon chemical shifts. Melting points were measured on an X-6 melting point apparatus and were uncorrected. Elemental analyses were performed on a Vario EL elemental analyzer.

**Preparation of  $[\eta^5\text{-1,3-(Me}_3\text{C)}_2\text{C}_5\text{H}_3]_2\text{La}(\mu\text{-OBC}_8\text{H}_{14})(\text{THF})$  (3).** A solution of 9-borabicyclo[3.3.1]nonane (9-BBN; 0.0586 g, 0.48 mmol) in THF (1 mL) was slowly added to a toluene (9 mL) solution of  $[\eta^5\text{-1,3-(Me}_3\text{C)}_2\text{C}_5\text{H}_3]_2\text{Ce}(\text{CH}_2\text{C}_6\text{H}_4\text{-}o\text{-NMe}_2)$  (0.151 g, 0.24 mmol). After stirring at room temperature for 2 h, the solvent was removed under vacuum. THF (2 mL) was added to the residue, and then diffusion of n-hexane into the solution gave colorless crystals of 3. Yield: 0.123 g (73%). M.p.: 72-

74 °C.  $^1\text{H}$  NMR (600 MHz,  $\text{C}_6\text{D}_6$ )  $\delta$  = 6.18 (d,  $J$  = 2.5 Hz, 4H, ring CH), 6.12 (t,  $J$  = 2.5 Hz, 2H, ring CH), 3.65 (m, 4H, thf), 2.15 (m, 10H,  $\text{BC}_8\text{H}_{14}$ ), 1.69 (m, 2H,  $\text{BC}_8\text{H}_{14}$ ), 1.38 (s, 36H,  $\text{C}(\text{CH}_3)_3$ ), 1.28 (m, 4H, thf), 1.15 (m, 2H,  $\text{BC}_8\text{H}_{14}$ )  $^{13}\text{C}\{^1\text{H}\}$  NMR (151 MHz,  $\text{C}_6\text{D}_6$ )  $\delta$  = 141.24 (ring C), 108.35 (ring C), 107.26 (ring C), 70.97 (thf), 33.96 (CH), 32.20 ( $\text{C}(\text{CH}_3)_3$ ), 32.07 ( $\text{C}(\text{CH}_3)_3$ ), 24.63( $\text{CH}_2$ ), 24.03 ( $\text{CH}_2$ ). IR (KBr,  $\text{cm}^{-1}$ ):  $\nu$  = 2955 (s), 2863 (m), 1659 (m), 1617 (m), 1462 (m), 1406 (s), 1360 (m), 1287 (m), 1251 (m), 1227 (m), 1200 (m), 1161 (m), 1023 (m), 931 (m), 801 (m). Anal. Calcd for  $\text{C}_{38}\text{H}_{64}\text{BLaO}_2$ : C, 64.96; H, 9.18. Found: C, 64.87; H, 9.15.

The residue was re-extracted with n-hexane, and the solvent/volatiles were removed under vacuum to give the oily  $(\text{Me}_2\text{N-}o\text{-C}_6\text{H}_4\text{CH}_2)\text{BC}_8\text{H}_{14}$ . By  $^1\text{H}$  NMR spectroscopy,  $(\text{Me}_2\text{N-}o\text{-C}_6\text{H}_4\text{CH}_2)\text{BC}_8\text{H}_{14}$  is spectroscopically identical to the previous report.<sup>2</sup>

**Preparation of  $[\eta^5\text{-1,3-(Me}_3\text{C)}_2\text{C}_5\text{H}_3]_2\text{Ce}(\mu\text{-OBC}_8\text{H}_{14})(\text{THF})$  (4).** This compound was prepared as yellow crystals from the reaction of  $[\eta^5\text{-1,3-(Me}_3\text{C)}_2\text{C}_5\text{H}_3]_2\text{La}(\text{CH}_2\text{C}_6\text{H}_4\text{-}o\text{-NMe}_2)$  (0.150 g, 0.24 mmol) and 9-BBN (0.0586 g, 0.48 mmol) in THF/toluene (10 mL) at room temperature and recrystallization from a THF/n-hexane solution by a procedure similar to that described in the synthesis of **3**. Yield: 0.128 g (76 %). M.p.: 74-76 °C.  $^1\text{H}$  NMR (600 MHz,  $\text{C}_6\text{D}_6$ ):  $\delta$  =  $^1\text{H}$  NMR (600 MHz,  $\text{C}_6\text{D}_6$ )  $\delta$  = 12.24 (br, 2H, ring CH), 11.57 (br, 4H, ring CH), 9.17 (br, 4H, thf), 7.13 (br, 2H,  $\text{BC}_8\text{H}_{14}$ ), 6.75 (br, 4H, thf), 2.36 (br, 2H,  $\text{BC}_8\text{H}_{14}$ ), -2.25 (s, 36H,  $\text{C}(\text{CH}_3)_3$ ), -2.63 (br, 5H,  $\text{BC}_8\text{H}_{14}$ ), -3.89 (br, 4H,  $\text{BC}_8\text{H}_{14}$ ), -5.14 (br, 1H,  $\text{BC}_8\text{H}_{14}$ ). IR (KBr,  $\text{cm}^{-1}$ ):  $\nu$  = 2954 (m), 2863 (w), 1655 (m), 1616 (m), 1462 (w), 1386 (s), 1361 (m), 1284 (w), 1256 (m), 1200 (w), 1180 (s), 1145 (s), 1077 (s), 1051 (m), 1019 (m), 953 (m) 802 (w). Anal. Calcd for  $\text{C}_{38}\text{H}_{64}\text{BCeO}_2$ : C, 64.85;

H, 9.17. Found: C, 64.78; H, 9.15.

**Preparation of  $[\eta^5\text{-1,3-(Me}_3\text{C)}_2\text{C}_5\text{H}_3]_2\text{La(OC}_6\text{H}_{11}\text{)(THF)}$  (**5**).** A solution of 9-BBN (0.0293 g, 0.24 mmol) in toluene (5 mL) was slowly added to a toluene (5 mL) solution of  $[\eta^5\text{-1,3-(Me}_3\text{C)}_2\text{C}_5\text{H}_3]_2\text{La(CH}_2\text{C}_6\text{H}_4\text{-}o\text{-NMe}_2\text{)}$  (0.151 g, 0.24 mmol) and cyclohexene oxide (0.024 g, 0.24 mmol). After stirring at room temperature for 5 h, the solvent was removed under vacuum. THF (2 mL) was added to the residue, and then diffusion of n-hexane into the solution gave colorless crystals of **5**. Yield: 0.105 g (66 %). M.p.: 106-108 °C.  $^1\text{H NMR}$  (600 MHz,  $\text{C}_6\text{D}_6$ )  $\delta$  = 6.18-6.16 (m, 6H, ring CH), 3.85-3.82 (m, 1H, OCH), 3.65 (t,  $J$  = 6.3 Hz, 4H, thf), 2.11-2.04 (m, 2H,  $\text{CH}_2$ ), 1.78 (br, 2H,  $\text{CH}_2$ ), 1.59 (m, 1H,  $\text{CH}_2$ ), 1.40 (s, 36H,  $\text{C(CH}_3\text{)}_3$ ), 1.34-1.31 (m, 8H, thf and  $\text{CH}_2$ ), 1.14 (br, 1H,  $\text{CH}_2$ ).  $^{13}\text{C}\{^1\text{H}\}$  NMR (151 MHz,  $\text{C}_6\text{D}_6$ )  $\delta$  = 140.35 (ring C), 107.31 (ring C), 106.99 (ring C), 77.92 (OCH), 69.97 (thf), 39.39 ( $\text{CH}_2$ ), 32.18 ( $\text{C(CH}_3\text{)}_3$ ), 32.07 ( $\text{C(CH}_3\text{)}_3$ ), 26.23 (thf), 25.47 ( $\text{CH}_2$ ), 24.90 ( $\text{CH}_2$ ). IR (KBr,  $\text{cm}^{-1}$ ):  $\nu$  = 2962 (m), 2854 (m), 1620 (m), 1459 (m), 1385 (m), 1356 (m), 1260 (s), 1199 (m), 1093 (s), 1020 (s), 933 (m), 798 (s). Anal. Calcd for  $\text{C}_{36}\text{H}_{61}\text{LaO}_2$ : C, 65.04; H, 9.25. Found: C, 64.93; H, 9.22.

**Preparation of  $[\eta^5\text{-1,3-(Me}_3\text{C)}_2\text{C}_5\text{H}_3]_2\text{Ce(OC}_6\text{H}_{11}\text{)(THF)}$  (**6**).** This compound was prepared as yellow crystals from the reaction of  $[\eta^5\text{-1,3-(Me}_3\text{C)}_2\text{C}_5\text{H}_3]_2\text{Ce(CH}_2\text{C}_6\text{H}_4\text{-}o\text{-NMe}_2\text{)}$  (0.151 g, 0.24 mmol), cyclohexene oxide (0.024 g, 0.24 mmol) and 9-BBN (0.0293 g, 0.24 mmol) in toluene (10 mL) at room temperature and recrystallization from a THF/n-hexane solution by a procedure similar to that described in the synthesis of **5**. Yield: 0.120 g (75%). M.p.: 110-112 °C.  $^1\text{H NMR}$  (600 MHz,  $\text{C}_6\text{D}_6$ ):  $\delta$  = 20.74 (br, 6H, ring CH), 11.01 (br, 2H), 9.38 (br, 2H), 8.53 (m, 1H), 7.50 (m, 1H), -1.44 (br, 4H), -

1.54 (br, 6H), -4.67 (br, 1H), -4.71 (br, 2H), -7.39 (s, 36H, C(CH<sub>3</sub>)<sub>3</sub>). IR (KBr, cm<sup>-1</sup>):  $\nu$  = 2946 (s), 2806 (m), 1547 (m), 1460 (m), 1387 (m), 1359 (m), 1248 (m), 1199 (m), 1162 (m), 1093 (s), 1057 (m), 1025 (m), 932 (m), 801 (s). Anal. Calcd for C<sub>36</sub>H<sub>61</sub>CeO<sub>2</sub>: C, 64.92; H, 9.23. Found: C, 65.76; H, 9.26.

**Preparation of {[ $\eta^5$ -1,3-(Me<sub>3</sub>C)<sub>2</sub>C<sub>5</sub>H<sub>3</sub>]<sub>2</sub>LaCl}<sub>2</sub> (7).** A solution of 9-BBN (0.0293 g, 0.24 mmol) in toluene (5 mL) was slowly added to a toluene (5 mL) solution of [ $\eta^5$ -1,3-(Me<sub>3</sub>C)<sub>2</sub>C<sub>5</sub>H<sub>3</sub>]<sub>2</sub>La(CH<sub>2</sub>C<sub>6</sub>H<sub>4</sub>-*o*-NMe<sub>2</sub>) (0.151 g, 0.24 mmol) and Me<sub>3</sub>SiCl (0.0261 g, 0.24 mmol). After stirring at room temperature for 2 h, the solvent was removed under vacuum. THF (3 mL) was added to the residue, and then diffusion of n-hexane into the solution gave colorless crystals of **7**. Yield: 0.099 g (78%). M.p.: 70-72 °C. <sup>1</sup>H NMR (600 MHz, C<sub>6</sub>D<sub>6</sub>)  $\delta$  = 6.39 (d, *J* = 2.4 Hz, 4H, ring CH), 6.33 (t, *J* = 2.4 Hz, 2H, ring CH), 1.40 (s, 36H, C(CH<sub>3</sub>)<sub>3</sub>). <sup>13</sup>C NMR (151 MHz, C<sub>6</sub>D<sub>6</sub>)  $\delta$  = 145.03 (ring C), 110.34 (ring C), 108.53 (ring C), 32.67 (C(CH<sub>3</sub>)<sub>3</sub>), 32.27 (C(CH<sub>3</sub>)<sub>3</sub>). IR (KBr, cm<sup>-1</sup>):  $\nu$  = 2951 (w), 2879 (m), 1564 (s), 1442 (m), 1345 (m), 1316 (m), 1299 (m), 1259 (m), 1102 (s), 1061 (s), 1022 (w), 915 (s), 805 (m). Anal. Calcd for C<sub>52</sub>H<sub>84</sub>Cl<sub>2</sub>La<sub>2</sub>: C, 59.04; H, 8.00. Found: C, 58.95; H, 7.97. By <sup>1</sup>H NMR spectroscopy, Me<sub>3</sub>SiH is spectroscopically identical to the previous report.<sup>3</sup>

**Preparation of {[ $\eta^5$ -1,3-(Me<sub>3</sub>C)<sub>2</sub>C<sub>5</sub>H<sub>3</sub>]<sub>2</sub>CeCl}<sub>2</sub> (8).** This compound was prepared as yellow crystals from the reaction of [ $\eta^5$ -1,3-(Me<sub>3</sub>C)<sub>2</sub>C<sub>5</sub>H<sub>3</sub>]<sub>2</sub>Ce(CH<sub>2</sub>C<sub>6</sub>H<sub>4</sub>-*o*-NMe<sub>2</sub>) (0.151 g, 0.24 mmol), Me<sub>3</sub>SiCl (0.0261 g, 0.24 mmol) and 9-BBN (0.0293 g, 0.24 mmol) in toluene (10 mL) at room temperature and recrystallization from a THF/n-hexane solution by a procedure similar to that described in the synthesis of **5**. Yield: 0.102 g (80 %). The solid-state structure of the complex has been confirmed by single crystal

X-ray diffraction, which is identical to that reported.<sup>4</sup>

**Preparation of  $[\eta^5\text{-1,3-(Me}_3\text{C)}_2\text{C}_5\text{H}_3]_2\text{La}(\mu\text{-}\eta^2\text{:}\eta^2\text{-C}_{12}\text{H}_8\text{N}_2)$  (**9**).** A solution of 9-BBN (0.0293 g, 0.24 mmol) in toluene (5 mL) was slowly added to a toluene (5 mL) solution of  $[\eta^5\text{-1,3-(Me}_3\text{C)}_2\text{C}_5\text{H}_3]_2\text{La}(\text{CH}_2\text{C}_6\text{H}_4\text{-}o\text{-NMe}_2)$  (0.151 g, 0.24 mmol) and phenazine (0.0216 g, 0.12 mmol) with stirring at -20 °C. After stirring at room temperature for 6 h, the solution was filtered. The volume of the filtrate was reduced to 2 mL, the purple crystals of **9** were isolated at room temperature in the glovebox after addition of a few drops of n-hexane. n-Hexane solvated molecules were easily lost upon isolation of the compound as a dry crystalline solid. Yield: 0.087 g (62 %). M.p.: 123-125 °C. <sup>1</sup>H NMR (600 MHz, C<sub>6</sub>D<sub>6</sub>) δ = 6.45 (br, 4H, ring CH), 6.29 (br, 2H, ring CH), 6.24 (m, 2H, C<sub>12</sub>N<sub>2</sub>H<sub>8</sub>), 5.75 (m, 2H, C<sub>12</sub>N<sub>2</sub>H<sub>8</sub>), 1.36 (s, 36H, C(CH<sub>3</sub>)<sub>3</sub>). <sup>13</sup>C NMR (151 MHz, C<sub>6</sub>D<sub>6</sub>) δ = 145.10 (C<sub>12</sub>N<sub>2</sub>H<sub>8</sub>), 143.33 (ring C), 122.00 (C<sub>12</sub>N<sub>2</sub>H<sub>8</sub>), 110.98 (ring C), 108.41 (ring C), 108.13 (C<sub>12</sub>N<sub>2</sub>H<sub>8</sub>), 32.42 (C(CH<sub>3</sub>)<sub>3</sub>), 31.88 (C(CH<sub>3</sub>)<sub>3</sub>). IR (KBr, cm<sup>-1</sup>): ν = 2955 (m), 2861 (w), 1643 (m), 1622 (m), 1587 (m), 1509 (m), 1461 (s), 1386 (s), 1359 (m), 1298 (m), 1249 (m), 1198 (m), 1081(s), 1051(s), 1024 (s), 928 (m), 796 (s). A reproducible microanalysis could not be obtained for the compound as the solvent molecule (n-hexane) in the crystal lattice were slowly lost upon isolation of the compound as a dry crystalline solid.

**Preparation of  $[\eta^5\text{-1,3-(Me}_3\text{C)}_2\text{C}_5\text{H}_3]_2\text{Ce}(\mu\text{-}\eta^2\text{:}\eta^2\text{-C}_{12}\text{H}_8\text{N}_2)\cdot 2\text{C}_6\text{H}_{14}$  (**10**·2C<sub>6</sub>H<sub>14</sub>).** This compound was prepared as purple crystals from the reaction of  $[\eta^5\text{-1,3-(Me}_3\text{C)}_2\text{C}_5\text{H}_3]_2\text{Ce}(\text{CH}_2\text{C}_6\text{H}_4\text{-}o\text{-NMe}_2)$  (0.151 g, 0.24 mmol), phenazine (0.0216 g, 0.12 mmol) and 9-BBN (0.0293 g, 0.24 mmol) in toluene (10 mL) at room temperature and

recrystallization from a toluene/n-hexane solution by a procedure similar to that described in the synthesis of **9**. Yield: 0.081 g (58%). M.p.: 124-126 °C. <sup>1</sup>H NMR (600 MHz, C<sub>6</sub>D<sub>6</sub>): δ = -4.08 (br, 36H, C(CH<sub>3</sub>)<sub>3</sub>), -5.03(br, 2H), -5.44(br, 4H). IR (KBr, cm<sup>-1</sup>): ν = 2959 (m), 2861 (w), 1642 (m), 1618 (m), 1549 (m), 1500 (w), 1462 (m), 1385 (m), 1360 (m), 1259 (m), 1199 (w), 1180 (w), 1145 (m), 1078 (m), 1019 (m), 922 (w), 798 (s). A reproducible microanalysis could not be obtained for the compound as the solvent molecule (n-hexane) in the crystal lattice were slowly lost upon isolation of the compound as a dry crystalline solid.

**Preparation of  $[\{\eta^5\text{-1,3-(Me}_3\text{C)}_2\text{C}_5\text{H}_3\}_2\text{La}]_3\text{P}_7\cdot\text{C}_7\text{H}_8$  (**11**·C<sub>7</sub>H<sub>8</sub>).** A solution of 9-BBN (0.0293 g, 0.24 mmol) in toluene (5 mL) was slowly added to a toluene (5 mL) solution of  $[\eta^5\text{-1,3-(Me}_3\text{C)}_2\text{C}_5\text{H}_3\}_2\text{Ce}(\text{CH}_2\text{C}_6\text{H}_4\text{-}o\text{-NMe}_2)$  (0.151 g, 0.24 mmol) and P<sub>4</sub> (0.030 g, 0.24 mmol) with stirring at room temperature. After stirring at 40 °C for 12 h, the solution was filtered. The volume of the filtrate was reduced to 2 mL, the light yellow crystals of **11**·C<sub>7</sub>H<sub>8</sub> were isolated at room temperature in the glovebox after addition of a few drops of n-hexane. Yield: 0.063 g (44%). M.p.: 198-200 °C (decomposed). <sup>1</sup>H NMR (600 MHz, C<sub>6</sub>D<sub>6</sub>) δ = 7.14-7.11 (m, 2H, aryl H), 7.05-7.00 (m, 3H, aryl H), 6.52 (br, 12H, ring CH), 6.38 (br, 6H, ring CH), 2.11 (s, 3H, CH<sub>3</sub>), 1.50 (s, 108H, C(CH<sub>3</sub>)<sub>3</sub>). <sup>13</sup>C NMR (151 MHz, C<sub>6</sub>D<sub>6</sub>) δ = 143.62 (br, ring C), 137.48 (aryl C), 128.92 (aryl C), 128.15 (aryl C), 125.28 (aryl C), 111.11 (br, ring C), 33.05(C(CH<sub>3</sub>)<sub>3</sub>), 32.82 (C(CH<sub>3</sub>)<sub>3</sub>), 21.00 (CH<sub>3</sub>). <sup>31</sup>P NMR (-60°C, 243 MHz, C<sub>4</sub>D<sub>8</sub>O) δ = -16.79, -27.78, -110.74. IR (KBr, cm<sup>-1</sup>): ν = 2962 (m), 2862 (m), 1624 (m), 1476 (m), 1383 (m), 1354 (m), 1260 (s), 1243 (m), 1179 (m), 1083 (s), 1023 (s), 923 (w), 800 (m). Anal. Calcd for C<sub>85</sub>H<sub>134</sub>La<sub>3</sub>P<sub>7</sub>: C, 57.05; H, 7.55. Found:

C,56.92; H,7.49.

**Preparation of  $\{[\eta^5\text{-1,3-(Me}_3\text{C)}_2\text{C}_5\text{H}_3]_2\text{Ce}\}_3\text{P}_7\cdot\text{C}_7\text{H}_8$  (**12**·**C<sub>7</sub>H<sub>8</sub>**).** This compound was prepared as brown crystals from the reaction of  $[\eta^5\text{-1,3-(Me}_3\text{C)}_2\text{C}_5\text{H}_3]_2\text{Ce}(\text{CH}_2\text{C}_6\text{H}_4\text{-}o\text{-NMe}_2)$  (0.151 g, 0.24 mmol),  $\text{P}_4$  (0.030 g, 0.24 mmol) and 9-BBN (0.0293 g, 0.24 mmol) in toluene (10 mL) at 40 °C and recrystallization from a toluene/n-hexane solution by a procedure similar to that described in the synthesis of **11**. Yield: 0.059 g (41%). M.p.: 198-200 °C (decomposed).  $^1\text{H}$  NMR (600 MHz,  $\text{C}_6\text{D}_6$ )  $\delta$  = 7.15-7.11 (m, 2H, aryl H), 7.05-7.00 (m, 3H, aryl H), 2.11 (s, 3H, toluene  $\text{CH}_3$ ), -0.42 (br, 4H, ring CH), -3.45 (br, 8H, ring CH), -6.90 (br, 108H,  $\text{C}(\text{CH}_3)_3$ ), -11.29 (br, 6H, ring CH).  $^{31}\text{P}$  NMR (-60°C, 243 MHz,  $\text{C}_6\text{D}_6$ )  $\delta$  = -190.48. IR (KBr,  $\text{cm}^{-1}$ ):  $\nu$  = 2956 (m), 2860 (m), 1652 (w), 1627 (m), 1463 (m), 1385 (m), 1354 (w), 1252 (m), 1198 (m), 1046 (s), 1022 (s), 930 (w), 811 (m). Anal. Calcd for  $\text{C}_{85}\text{H}_{134}\text{Ce}_3\text{P}_7$ : C, 56.93; H, 7.53. Found: C, 56.78; H, 7.47.

**X-ray Crystallography.** Single-crystal X-ray diffraction measurements were carried out on an Agilent SuperNova EosS2 diffractometer using graphite monochromated Cu  $\text{K}\alpha$  radiation ( $\lambda = 1.54184 \text{ \AA}$ ) or Mo  $\text{K}\alpha$  radiation ( $\lambda = 0.71073 \text{ \AA}$ ). The crystals were kept at 150 (10) K during data collection. The structures were solved by the Superflip<sup>5</sup> or ShelXT<sup>6</sup> structure solution program in Olex2<sup>7</sup> and refined using Full-matrix Least Squares based on  $F^2$  with program SHELXL-2018<sup>8</sup> within Olex2. Disorder was modelled using standard crystallographic methods including constraints and restraints where necessary. Crystal data and experimental data for **3-7** and **9-12** are summarized in Table S1.

## REFERENCES



1. D.Gu, C.Yi and W. Ren, *Inorg. Chem.*, 2019, **58**, 9260–9269.
2. C. Yi, Z. Xu, L. Chen and W. Ren, *Inorg. Chem.*, 2022, **61**, 5373–5379.
3. S. Park, B. G. Kim, I. Göttker-Schnetmann and M. Brookhart, *ACS Catal.*, 2012, **2**, 307–316.
4. E.B. Lobkovsky, Yu.K. Gunko and B.M. Bulychev, *J. Organomet. Chem.*, 1991, **406**, 343-52.
5. (a) L. Palatinus, G. Chapuis, *J. Appl. Cryst.*, 2007, **40**, 786-790. (b) L. Palatinus, A. van der Lee, *J. Appl. Cryst.*, 2008, **41**, 975-984. (c) L. Palatinus, S. J. Prathapa, S. van Smaalen, *J. Appl. Cryst.*, 2012, **45**, 575-580.
6. G. M. Sheldrick, *Acta Cryst. A*, 2015, **71**, 3-8.
7. O. V. Dolomanov, L. J. Bourhis, R. J. Gildea, J. A. K. Howard, H. Puschmann, *J. Appl. Cryst.*, 2009, **42**, 339-341.
8. G.M. Sheldrick, *Acta Cryst. C*, 2015, **71**, 3-8.

## ORTEP DIAGRAMS

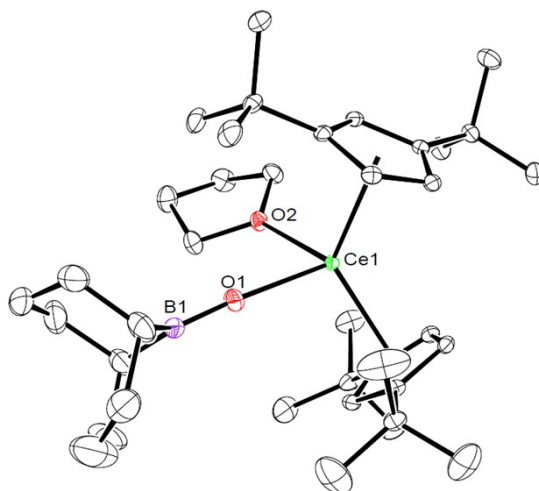

**Fig. S1** ORTEP representation of **4**. Displacement ellipsoids are set to 30% probability. The hydrogen atoms are omitted for clarity. Selected distances (Å) and angles (°): Ce(1)-O(1) 2.216(2), Ce(1)-O(2) 2.589(2), Ce(1)-Ct(1) 2.572, Ce(1)-Ct(2) 2.559, Ct(1)-Ce(1)-Ct(2) 124.9, B(1)-O(1)-Ce(1) 175.0(2).

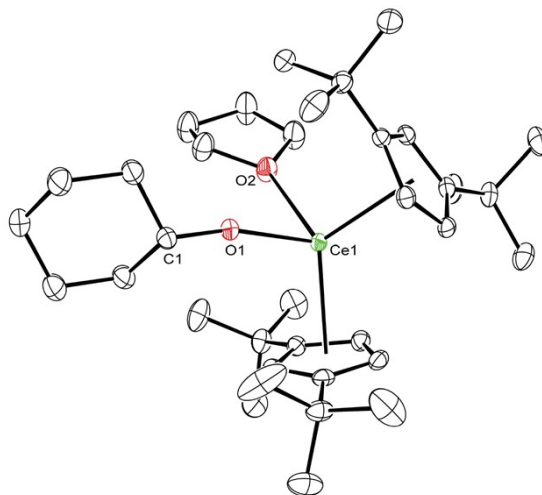

**Fig. S2** ORTEP representation of **6**. Displacement ellipsoids are set to 30% probability. The hydrogen atoms are omitted for clarity. Selected distances (Å) and angles (°): Ce(1)-O(1) 2.1477(16), Ce(1)-O(2) 2.5888(17), Ce(1)-Ct(1) 2.594, Ce(1)-Ct(2) 2.591, Ct(1)-Ce(1)-Ct(2) 122.9, C(1)-O(1)-Ce(1) 165.06(15).

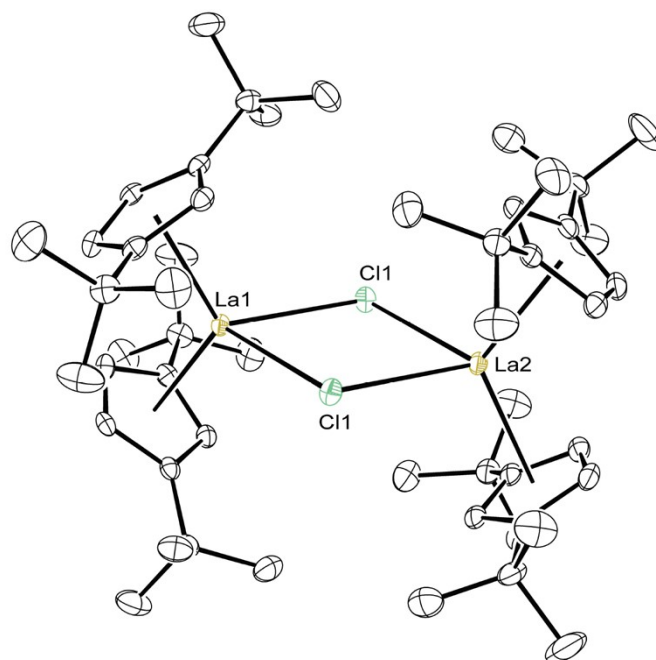

**Fig. S3** ORTEP representation of **7**. Displacement ellipsoids are set to 30% probability. The hydrogen atoms are omitted for clarity. Selected distances (Å) and angles (°): La(1)-Cl(1) 2.8933(7), La(2)-Cl(1) 2.8918(7), La(1)-Ct(1) 2.557, La(2)-Ct(2) 2.551, Ct(1)-La(1)-Ct(1) 121.6, Ct(2)-La(2)-Ct(2) 120.8

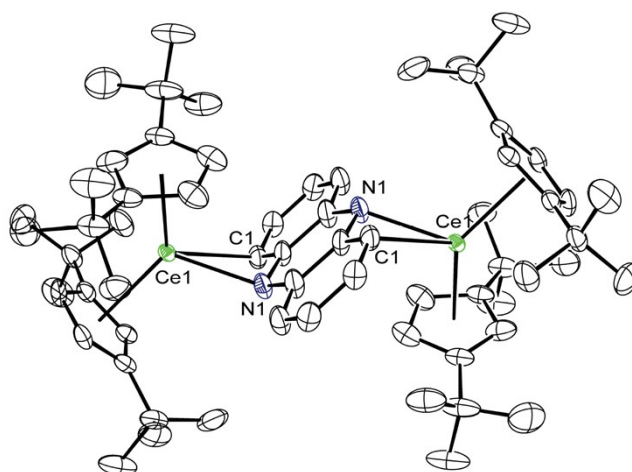

**Fig. S4** ORTEP representation of **10**. Displacement ellipsoids are set to 30% probability. The hydrogen atoms are omitted for clarity. Selected distances (Å) and angles (°): Ce(1)-N(1) 2.405(4), Ce(1)-C(2) 2.839(4), Ce(1)-Ct(1) 2.524, Ce(1)-Ct(2) 2.524, Ct(1)-Ce(1)-Ct(2) 134.1.

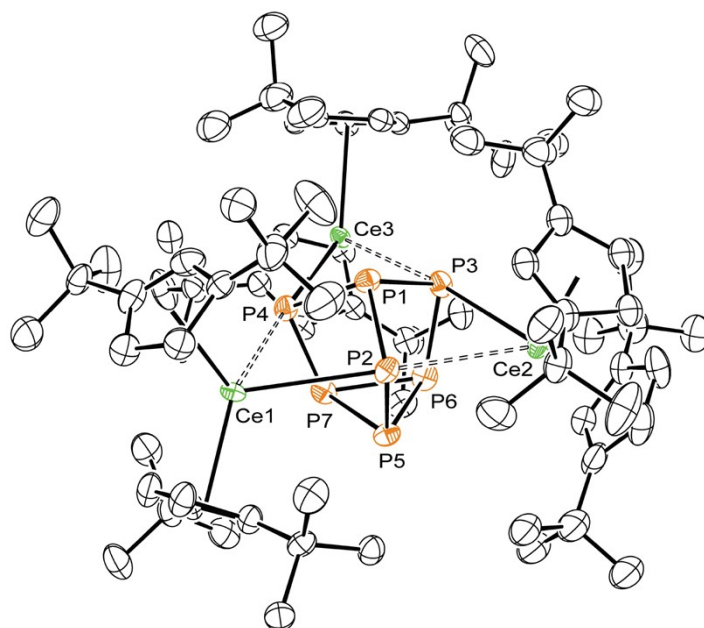

**Fig. S5** ORTEP representation of **12**. Displacement ellipsoids are set to 30% probability. The hydrogen atoms are omitted for clarity. Selected distances (Å) and angles (°): Ce(1)-P(2) 3.181(4), Ce(1)-P(4) 3.239(4), Ce(2)-P(3) 3.143(3), Ce(2)-P(2) 3.234(4), Ce(3)-P(3) 3.211(4), Ce(3)-P(4) 3.122(3), Ct(1)-Ce(1) 2.407, Ct(2)-Ce(1) 2.613, Ct(3)-Ce(2) 2.453, Ct(4)-Ce(2) 2.549, Ct(5)-Ce(3) 2.480, Ct(6)-Ce(3) 2.584, Ct(1)-Ce(1)-Ct(2) 117.7, Ct(3)-Ce(2)-Ct(4) 116.2, Ct(5)-Ce(3)-Ct(6) 118.1.

**Table S1.** Crystal data and experimental parameters for compounds **3-7** and **9-12**

| Compound                           | <b>3</b>                                          | <b>4</b>                                          | <b>5</b>                                         | <b>6</b>                                         | <b>7</b>                                                        |
|------------------------------------|---------------------------------------------------|---------------------------------------------------|--------------------------------------------------|--------------------------------------------------|-----------------------------------------------------------------|
| Formula                            | C <sub>38</sub> H <sub>64</sub> BLaO <sub>2</sub> | C <sub>38</sub> H <sub>64</sub> BCeO <sub>2</sub> | C <sub>36</sub> H <sub>61</sub> LaO <sub>2</sub> | C <sub>36</sub> H <sub>61</sub> CeO <sub>2</sub> | C <sub>52</sub> H <sub>84</sub> Cl <sub>2</sub> La <sub>2</sub> |
| Fw                                 | 702.61                                            | 703.82                                            | 664.75                                           | 665.96                                           | 1057.91                                                         |
| Crystal system                     | monoclinic                                        | monoclinic                                        | monoclinic                                       | monoclinic                                       | orthorhombic                                                    |
| Space group                        | P2 <sub>1</sub> /n                                | P2 <sub>1</sub> /n                                | P2 <sub>1</sub> /c                               | P2 <sub>1</sub> /c                               | Pccn                                                            |
| a/Å                                | 10.53775(16)                                      | 10.5206(3)                                        | 11.37190(18)                                     | 11.36744(17)                                     | 12.9548(3)                                                      |
| b/Å                                | 19.3733(3)                                        | 19.3399(5)                                        | 17.5341(3)                                       | 17.5348(3)                                       | 16.8937(3)                                                      |
| c/Å                                | 18.2349(3)                                        | 18.2318(5)                                        | 18.3300(3)                                       | 18.2956(3)                                       | 24.5878(5)                                                      |
| α/°                                | 90                                                | 90.00                                             | 90                                               | 90                                               | 90                                                              |
| β/°                                | 93.1475(14)                                       | 93.152(2)                                         | 107.0666(19)                                     | 107.3342(16)                                     | 90                                                              |
| γ/°                                | 90                                                | 90.00                                             | 90                                               | 90                                               | 90                                                              |
| Volume/Å <sup>3</sup>              | 3717.05(10)                                       | 3703.96(17)                                       | 3493.98(11)                                      | 3481.16(10)                                      | 5381.16(18)                                                     |
| Z                                  | 4                                                 | 4                                                 | 4                                                | 4                                                | 4                                                               |
| ρ <sub>calc</sub> /cm <sup>3</sup> | 1.256                                             | 1.262                                             | 1.264                                            | 1.271                                            | 1.306                                                           |
| μ/mm <sup>-1</sup>                 | 1.178                                             | 1.258                                             | 1.250                                            | 1.335                                            | 1.695                                                           |
| F(000)                             | 1480.0                                            | 1484.0                                            | 1400.0                                           | 1404.0                                           | 2176.0                                                          |
| Crystal size/mm <sup>3</sup>       | 0.2 × 0.2 × 0.05                                  | 0.2 × 0.2 × 0.02                                  | 0.2 × 0.2 × 0.15                                 | 0.2 × 0.2 × 0.2                                  | 0.2 × 0.2 × 0.05                                                |
| Radiation                          | MoKα                                              | MoKα                                              | MoKα                                             | MoKα                                             | MoKα                                                            |
| 2θ range (deg)                     | 6.694 to 52.742                                   | 7.038 to 52.744                                   | 6.776 to 52.744                                  | 6.586 to 52.74                                   | 6.644 to 52.744                                                 |
| Reflections collected              | 30964                                             | 30589                                             | 36244                                            | 36097                                            | 62442                                                           |
| Independent reflections            | 7592 [R <sub>int</sub> = 0.0321]                  | 7563 [R <sub>int</sub> = 0.0370]                  | 7122 [R <sub>int</sub> = 0.0311]                 | 7100 [R <sub>int</sub> = 0.0324]                 | 5501 [R <sub>int</sub> = 0.0368]                                |
| Data/restr/paras                   | 7592/8/401                                        | 7563/6/391                                        | 7122/44/386                                      | 7100/57/395                                      | 5501/0/266                                                      |
| GOF                                | 1.052                                             | 1.099                                             | 1.163                                            | 1.073                                            | 1.276                                                           |

|                                                |               |                |                 |                 |               |
|------------------------------------------------|---------------|----------------|-----------------|-----------------|---------------|
| R1/wR2 [ $I \geq 2\sigma(I)$ ]                 | 0.0256/0.0554 | 0.0337/ 0.0746 | 0.0367 / 0.0839 | 0.0265 / 0.0604 | 0.0345/0.0563 |
| R1/wR2 (all data)                              | 0.0340/0.0581 | 0.0407/ 0.0777 | 0.0415 / 0.0861 | 0.0316 / 0.0631 | 0.0439/0.0594 |
| Largest diff. peak/hole / $e \text{ \AA}^{-3}$ | 0.68/-0.40    | 1.19/-0.76     | 0.72/-0.84      | 0.56/-0.36      | 0.66/-0.68    |
| CCDC                                           | 2161841       | 2161842        | 2161843         | 2161844         | 2161845       |

| Compound                         | <b>9</b>                                                       | <b>10·2C<sub>6</sub>H<sub>14</sub></b>                          | <b>11·C<sub>7</sub>H<sub>8</sub></b>                            | <b>12·C<sub>7</sub>H<sub>8</sub></b>                            |
|----------------------------------|----------------------------------------------------------------|-----------------------------------------------------------------|-----------------------------------------------------------------|-----------------------------------------------------------------|
| Formula                          | C <sub>64</sub> H <sub>92</sub> La <sub>2</sub> N <sub>2</sub> | C <sub>76</sub> H <sub>120</sub> Ce <sub>2</sub> N <sub>2</sub> | C <sub>85</sub> H <sub>134</sub> La <sub>3</sub> P <sub>7</sub> | C <sub>85</sub> H <sub>134</sub> Ce <sub>3</sub> P <sub>7</sub> |
| Fw                               | 1167.21                                                        | 1341.97                                                         | 1789.43                                                         | 1793.06                                                         |
| Crystal system                   | triclinic                                                      | triclinic                                                       | triclinic                                                       | triclinic                                                       |
| Space group                      | P-1                                                            | P-1                                                             | P-1                                                             | P-1                                                             |
| a/Å                              | 10.2919(3)                                                     | 10.5325(2)                                                      | 14.7718(3)                                                      | 14.7799(5)                                                      |
| b/Å                              | 11.7807(2)                                                     | 13.8019(3)                                                      | 14.8165(5)                                                      | 14.8493(5)                                                      |
| c/Å                              | 14.5718(5)                                                     | 14.5653(3)                                                      | 22.3328(8)                                                      | 22.4110(9)                                                      |
| $\alpha$ /°                      | 78.604(2)                                                      | 64.338(2)                                                       | 74.861(3)                                                       | 74.202(4)                                                       |
| $\beta$ /°                       | 76.732(3)                                                      | 73.743(2)                                                       | 81.924(2)                                                       | 81.751(3)                                                       |
| $\gamma$ /°                      | 70.957(2)                                                      | 77.473(2)                                                       | 68.345(3)                                                       | 68.303(3)                                                       |
| Volume/Å <sup>3</sup>            | 1610.97(8)                                                     | 1820.95(7)                                                      | 4379.9(2)                                                       | 4392.4(3)                                                       |
| Z                                | 1                                                              | 1                                                               | 2                                                               | 2                                                               |
| $\rho_{\text{calc}}/\text{cm}^3$ | 1.203                                                          | 1.224                                                           | 1.357                                                           | 1.356                                                           |
| $\mu/\text{mm}^{-1}$             | 1.343                                                          | 1.273                                                           | 12.593                                                          | 13.295                                                          |
| F(000)                           | 604.0                                                          | 706.0                                                           | 1840.0                                                          | 1846.0                                                          |
| Crystal size/mm <sup>3</sup>     | 0.2 × 0.1 × 0.1                                                | 0.2 × 0.2 × 0.15                                                | 0.2 × 0.15 × 0.03                                               | 0.1 × 0.08 × 0.03                                               |

| Radiation                                   | MoK $\alpha$                     | MoK $\alpha$                     | CuK $\alpha$                      | CuK $\alpha$                      |
|---------------------------------------------|----------------------------------|----------------------------------|-----------------------------------|-----------------------------------|
| 2 $\theta$ range (deg)                      | 6.918 to 52.742                  | 6.59 to 52.742                   | 6.928 to 146.214                  | 6.888 to 143.8                    |
| Reflections collected                       | 32522                            | 29781                            | 38478                             | 29866                             |
| Independent reflections                     | 6565 [R <sub>int</sub> = 0.0457] | 7428 [R <sub>int</sub> = 0.0313] | 17187 [R <sub>int</sub> = 0.0325] | 16825 [R <sub>int</sub> = 0.0292] |
| Data/restr/paras                            | 6565/242/422                     | 7428/35/385                      | 17187/48/861                      | 16825/297/962                     |
| GOF                                         | 1.189                            | 1.076                            | 1.034                             | 1.033                             |
| R1/wR2 [ $I \geq 2\sigma(I)$ ]              | 0.0597 / 0.1456                  | 0.0393/0.1046                    | 0.0487/0.1254                     | 0.0496/0.1301                     |
| R1/wR2 (all data)                           | 0.0624 / 0.1471                  | 0.0442/0.1081                    | 0.0621/0.1341                     | 0.0582/0.1371                     |
| Largest diff. peak/hole / e Å <sup>-3</sup> | 1.68/-0.98                       | 1.29/-0.63                       | 1.97/-1.66                        | 1.25/-1.12                        |
| CCDC                                        | 2161846                          | 2161847                          | 2161848                           | 2161849                           |

---

### NMR Spectra of New Compounds

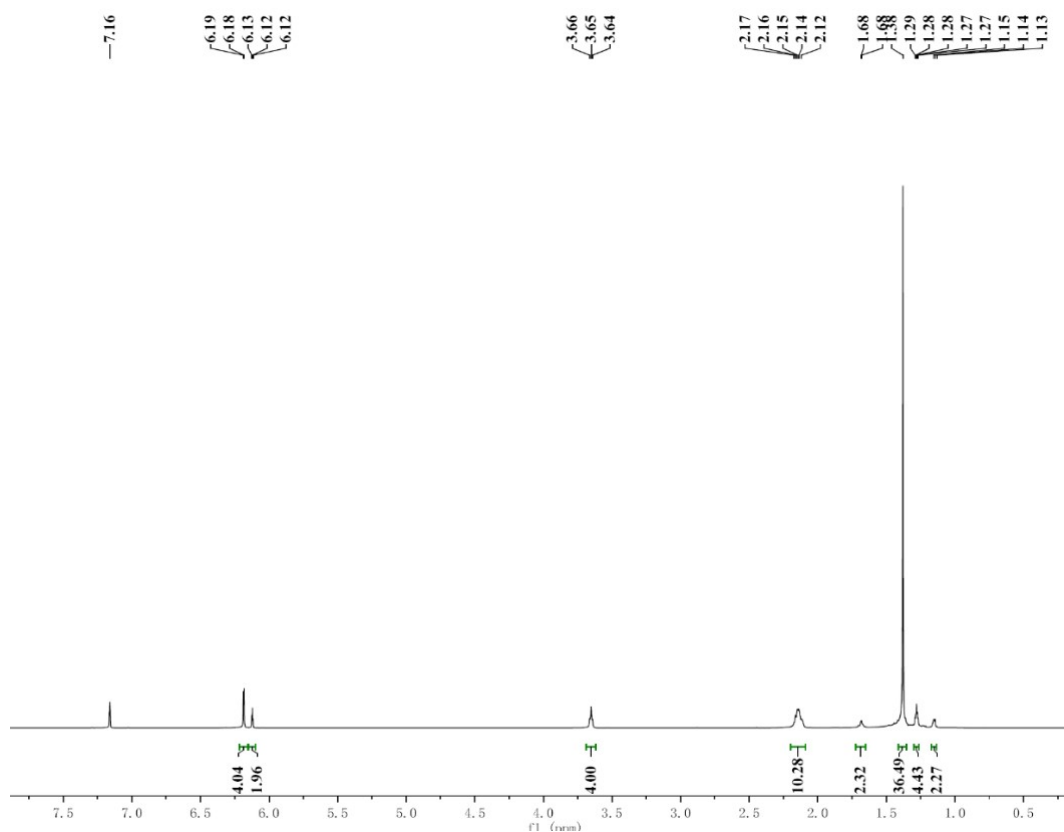

Fig. S6 <sup>1</sup>H NMR Spectrum of **3**

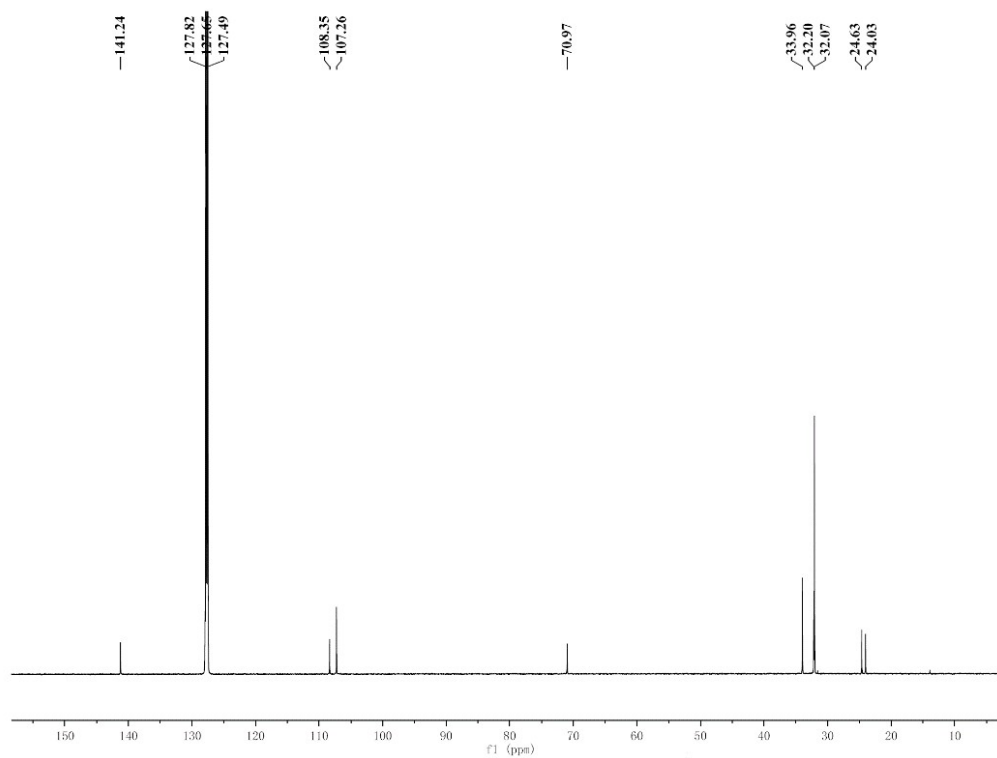

Fig. S7 <sup>13</sup>C NMR Spectrum of **3**



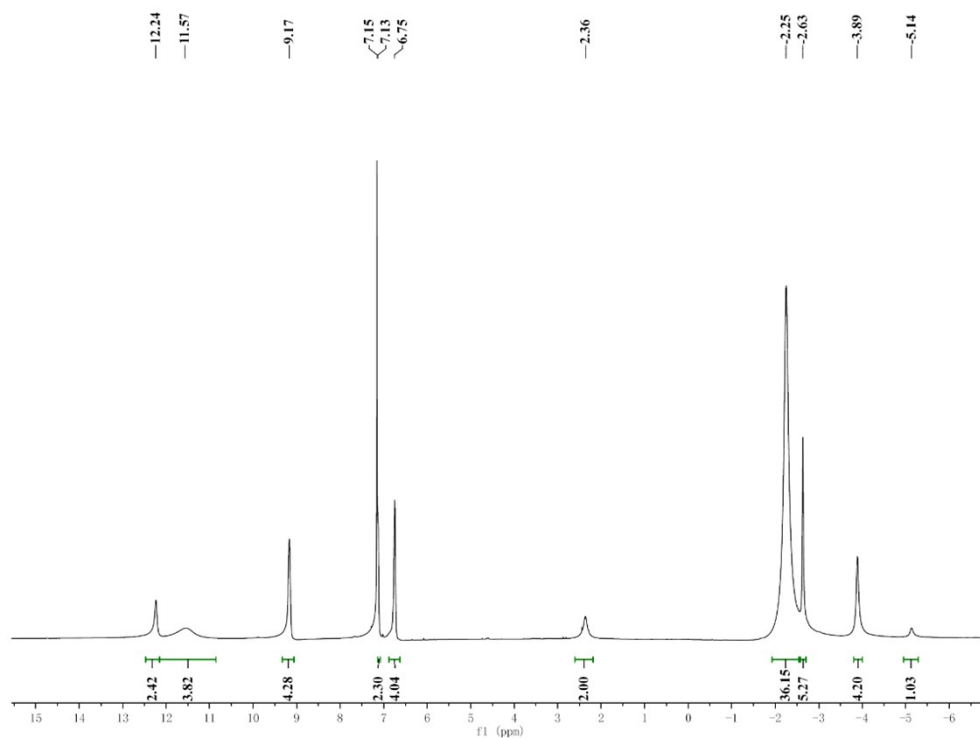

Fig. S8  $^1\text{H}$  NMR Spectrum of 4

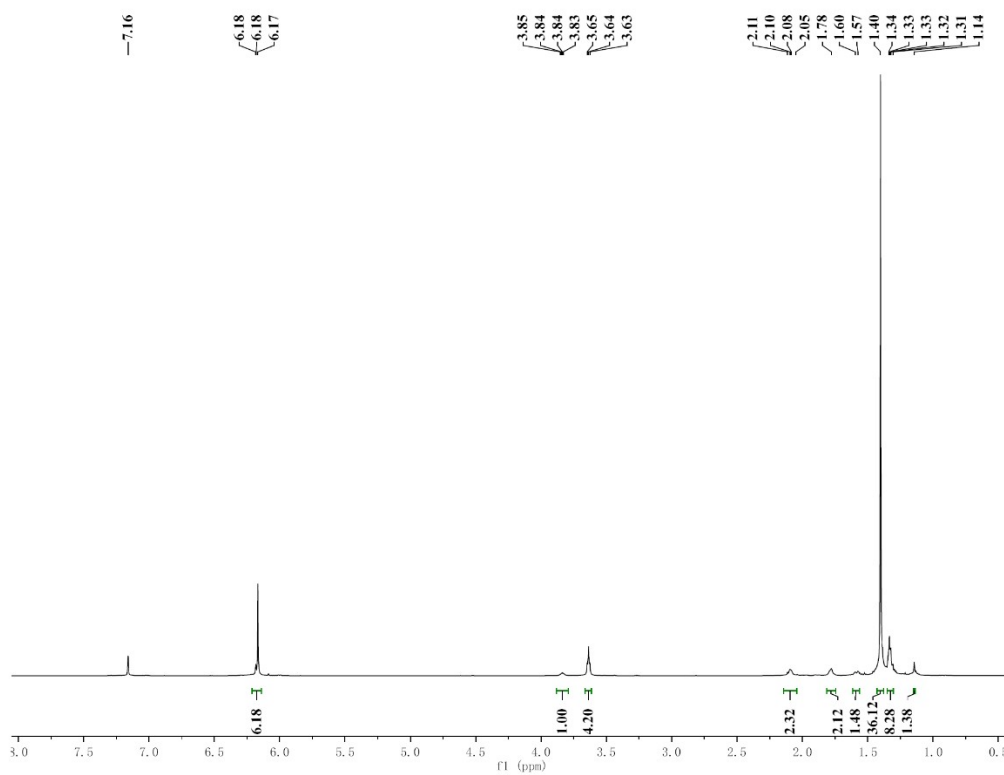

Fig. S9  $^1\text{H}$  NMR Spectrum of 5

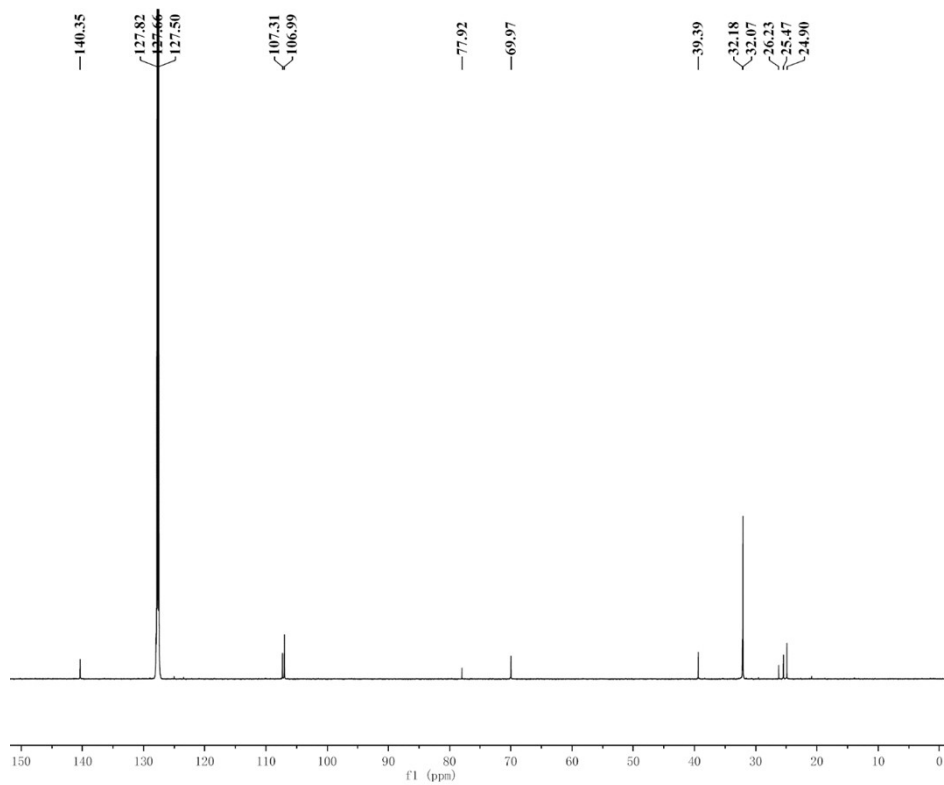

Fig. S10  $^{13}\text{C}$  NMR Spectrum of 5

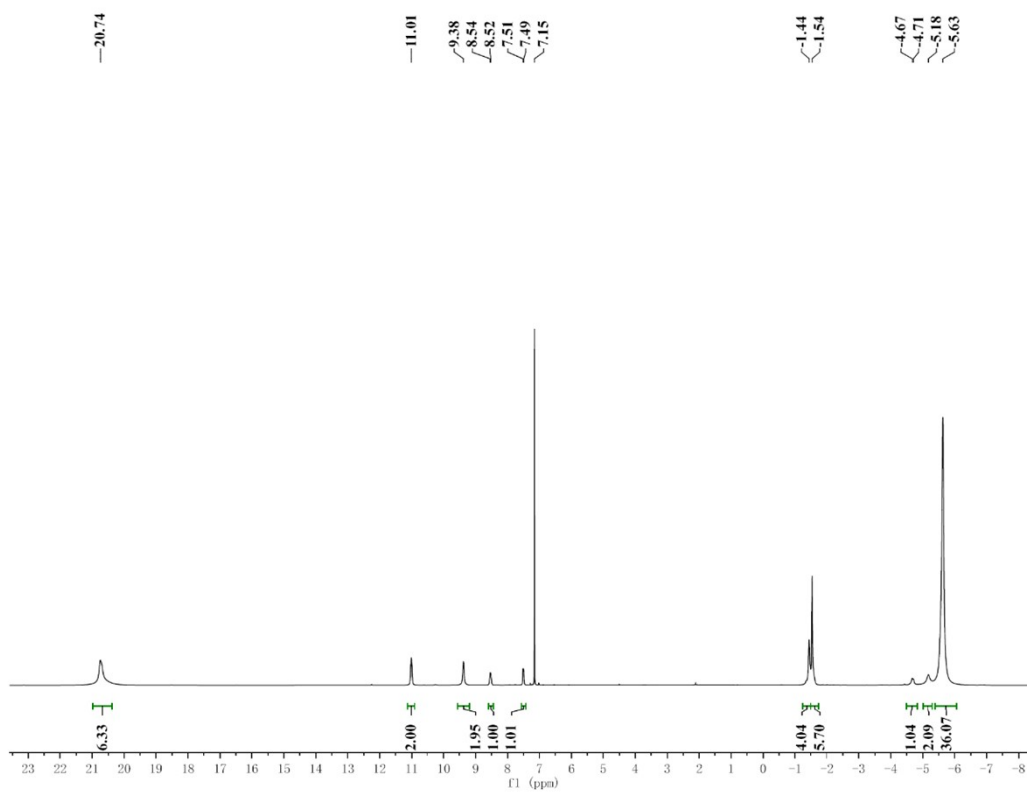

Fig. S11  $^1\text{H}$  NMR Spectrum of 6

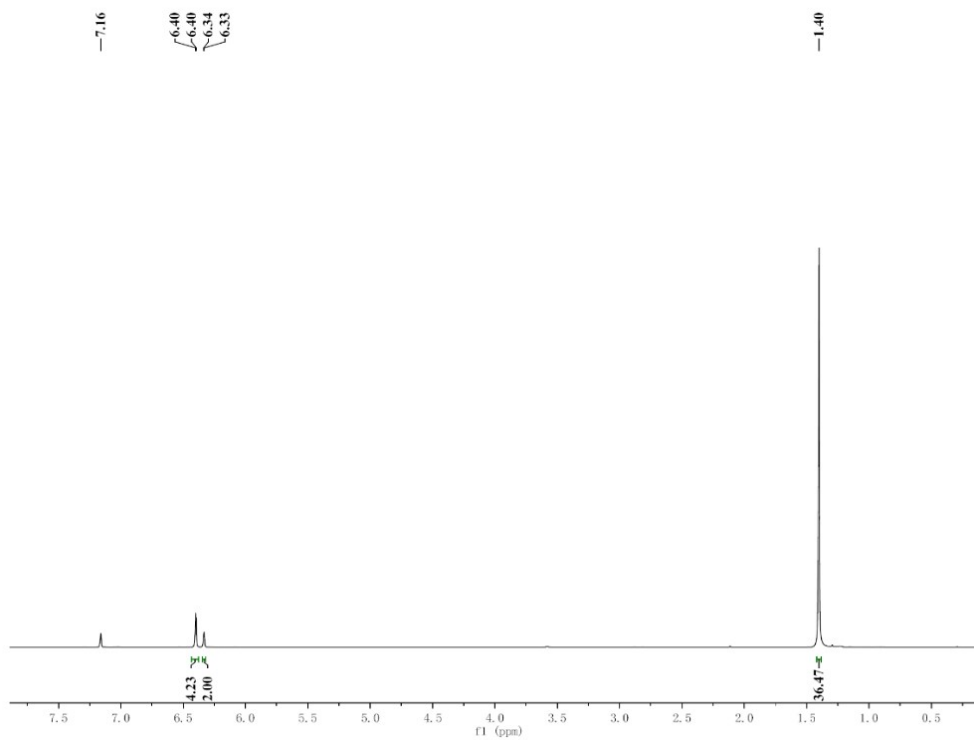

Fig. S12  $^1\text{H}$  NMR Spectrum of **7**

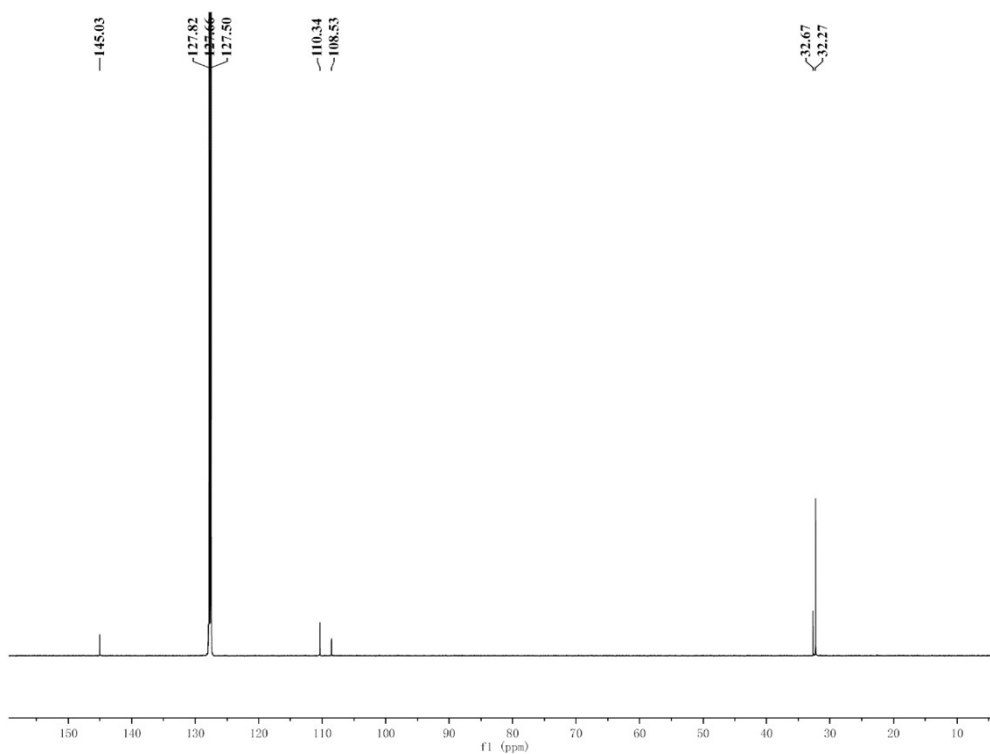

Fig. S13  $^{13}\text{C}$  NMR Spectrum of **7**

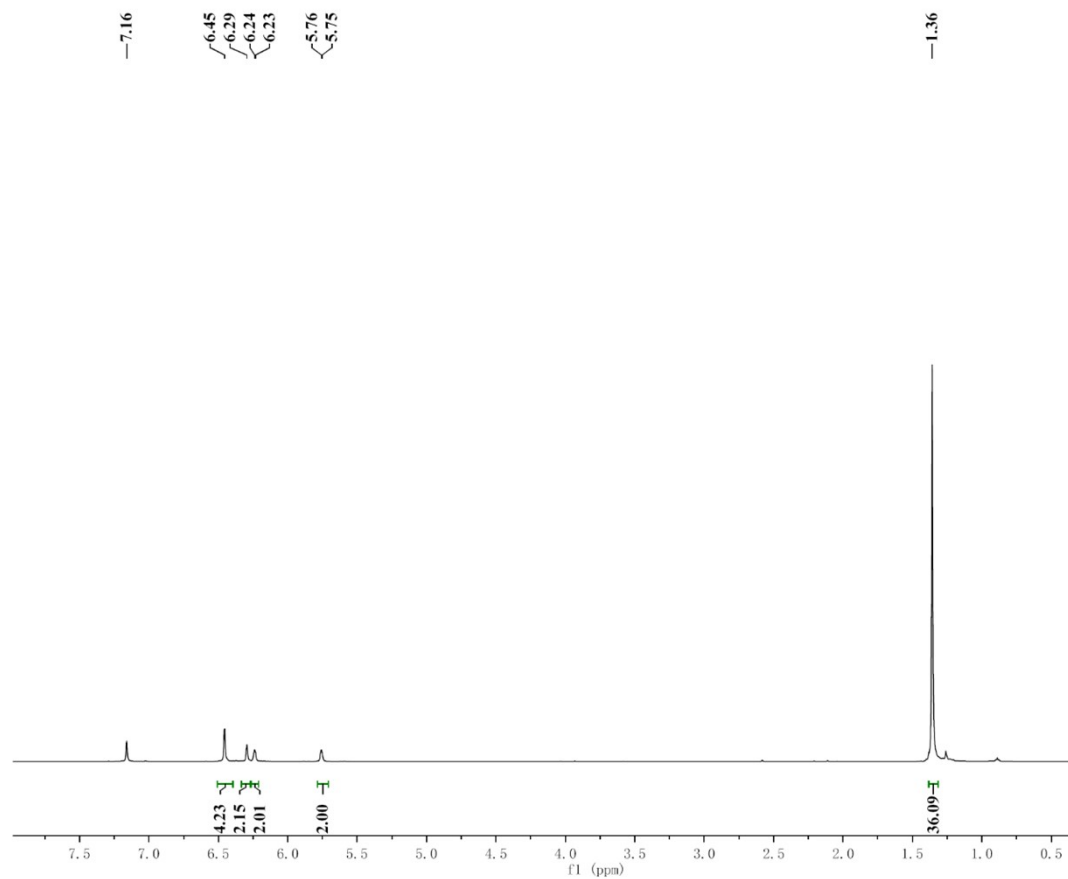

Fig. S14  $^1\text{H}$  NMR Spectrum of **9**

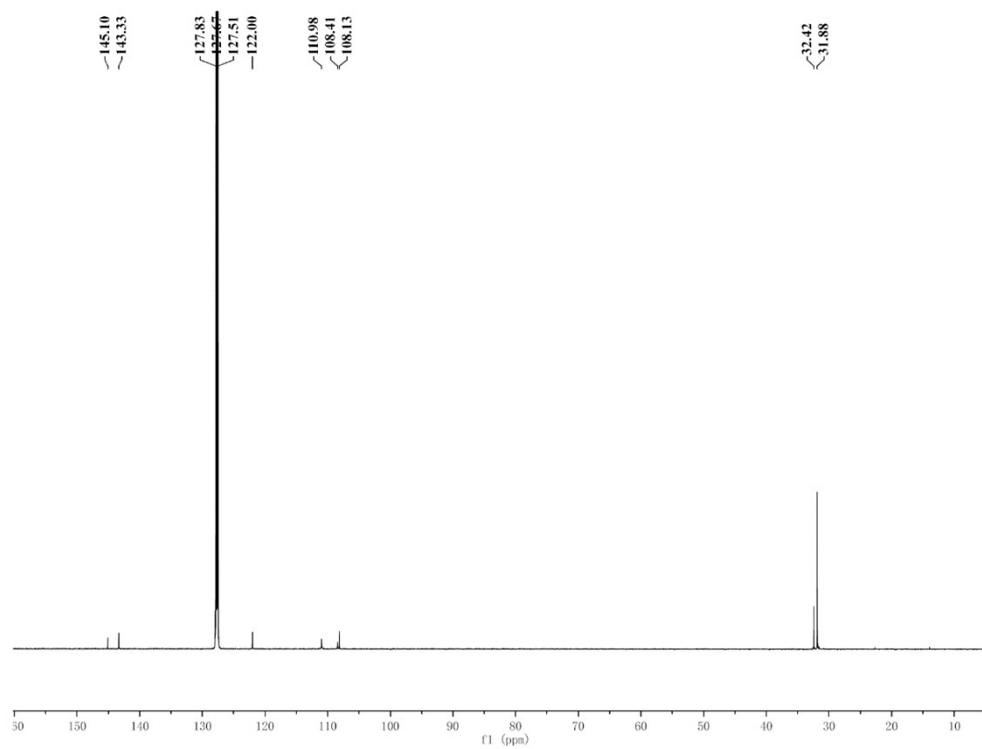

Fig. S15  $^{13}\text{C}$  NMR Spectrum of **9**

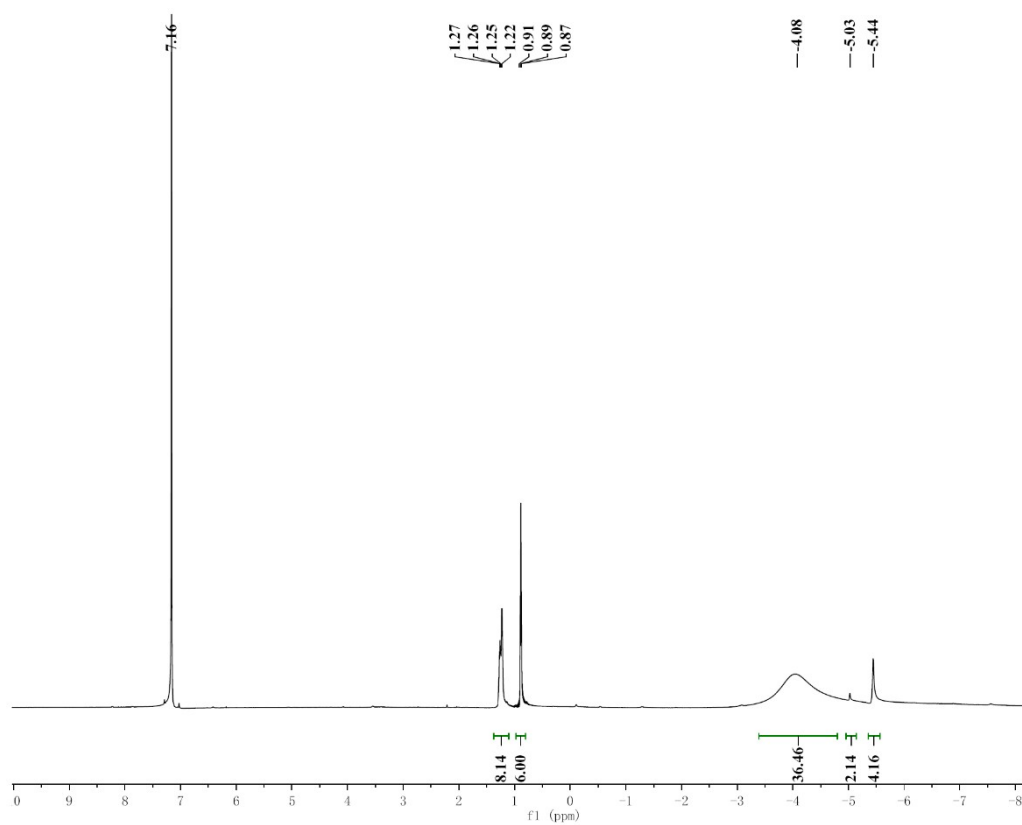

Fig. S16  $^1\text{H}$  NMR Spectrum of **10**

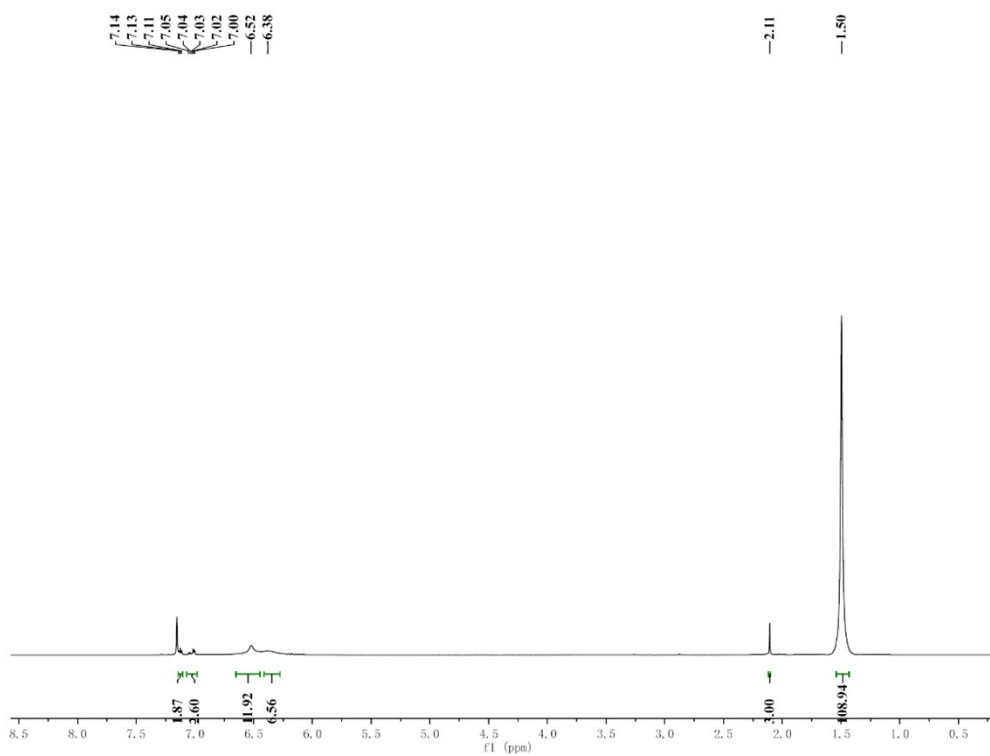

Fig. S17  $^1\text{H}$  NMR Spectrum of **11**

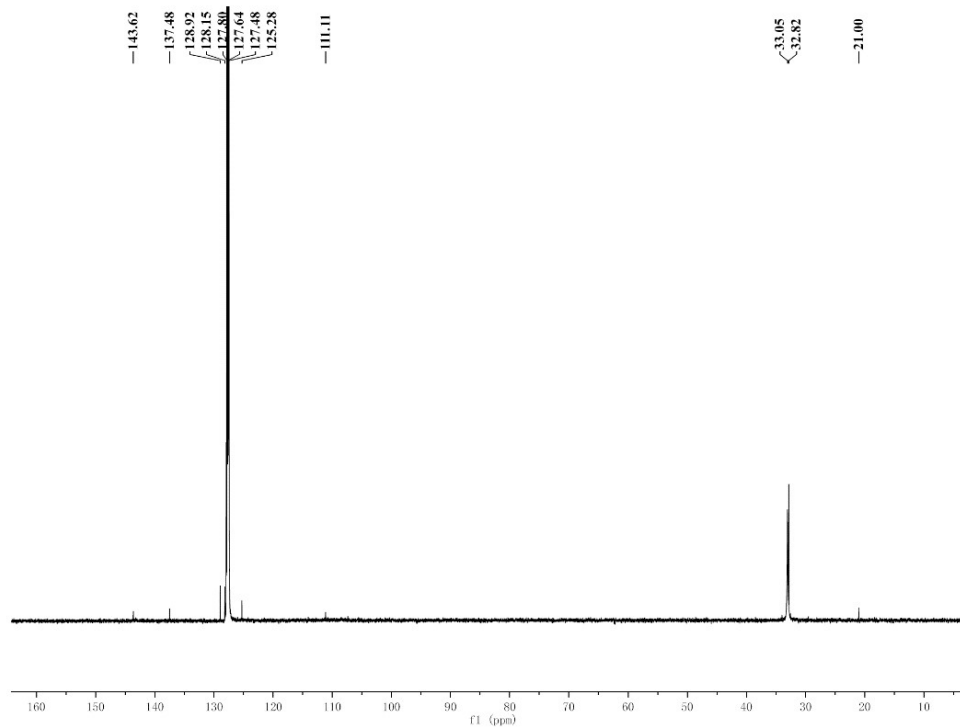

Fig. S18  $^{13}\text{C}$  NMR Spectrum of **11**

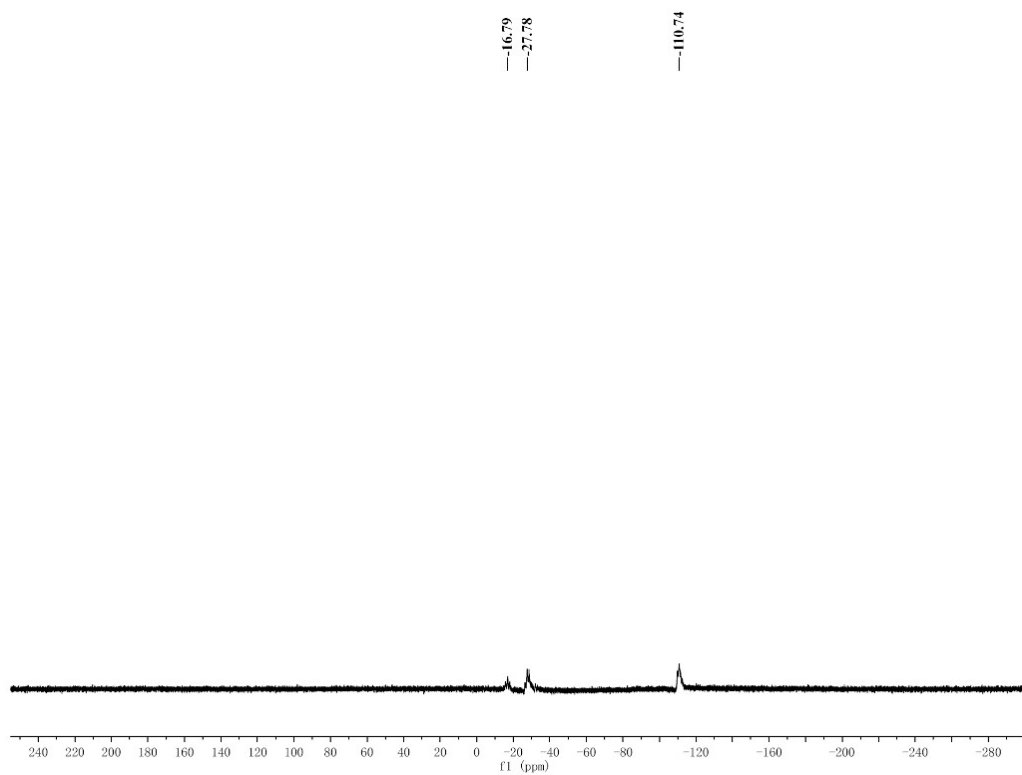

Fig. S19  $^{31}\text{P}$  NMR Spectrum of **11** ( $-60^\circ\text{C}$ , 243 MHz,  $\text{C}_4\text{D}_8\text{O}$ )

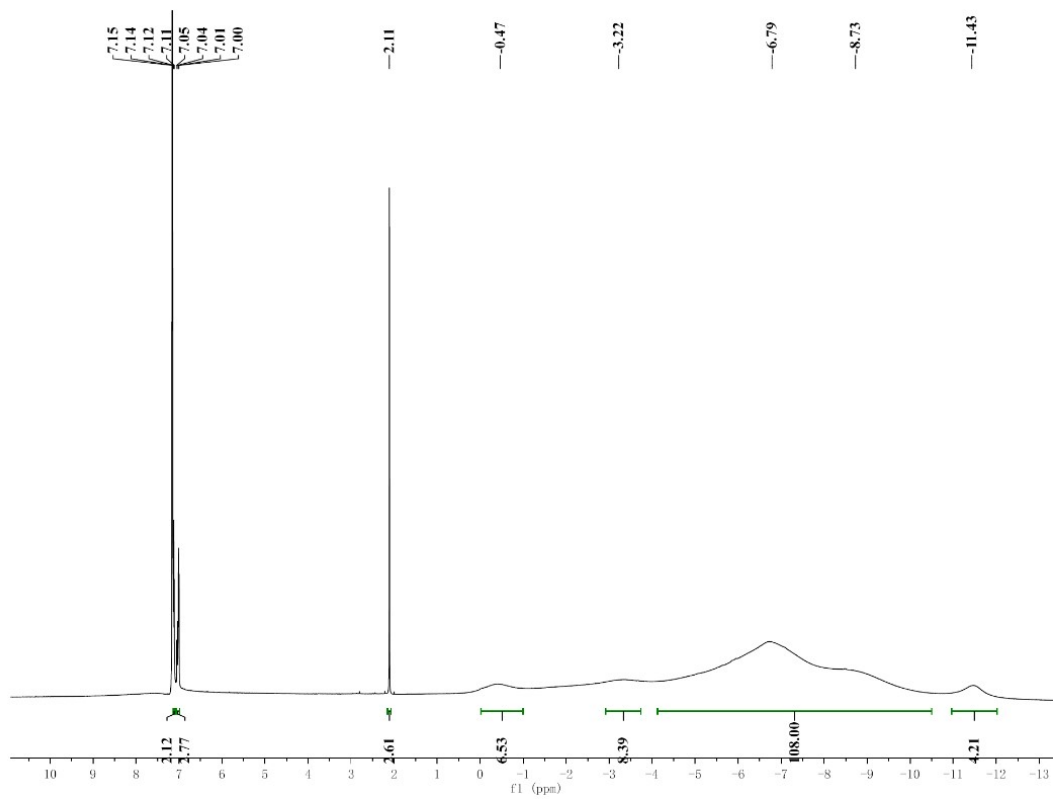

Fig. S20  $^1\text{H}$  NMR Spectrum of **12**

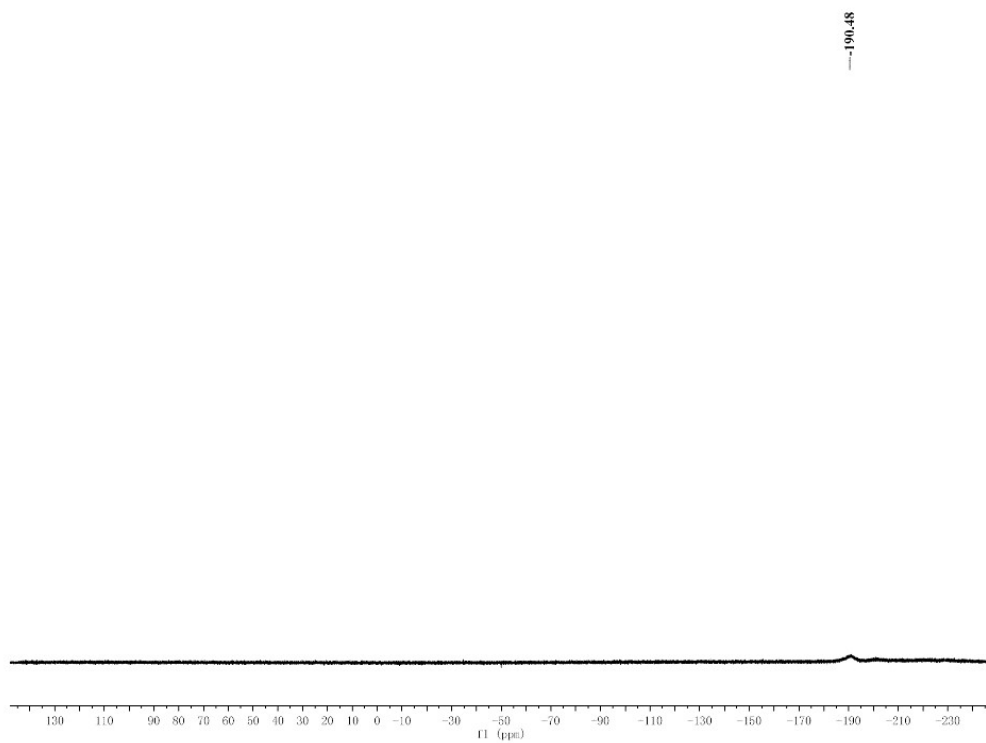

Fig. 21  $^{31}\text{P}$  NMR Spectrum of **12** (25°C, 243 MHz,  $\text{C}_6\text{D}_6$ )
